# Supplementary material for: Threshold-controlled ubiquitination of the EGFR directs receptor fate
Source: PubMed Central journal article supplement — EMBO J. 2013 Jun 25;32(15):2140–57. doi: 10.1038/emboj.2013.149 (PMC3730230; doi:10.1038/emboj.2013.149), 2013-06-25
Supplement: emboj2013149df1.pdf [file emboj2013149df1.pdf]

**A****HeLa cells**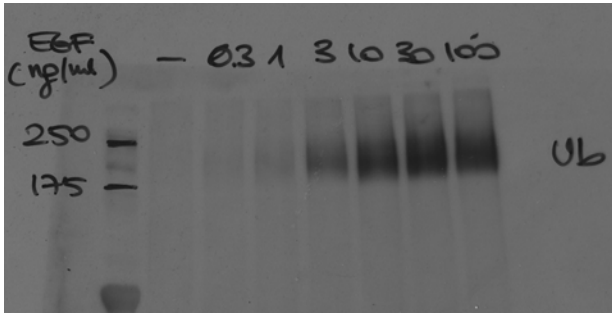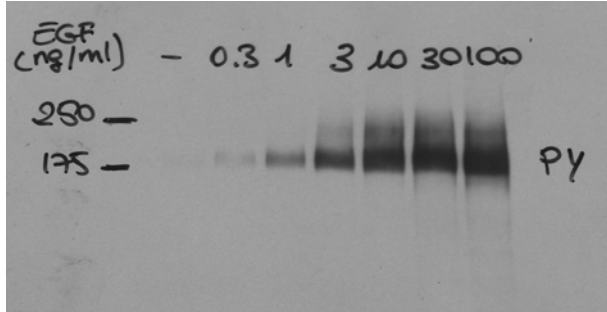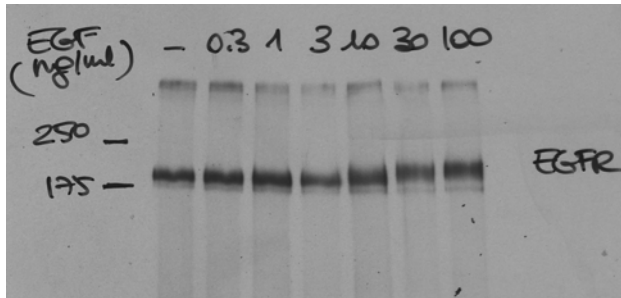**NR6 cells**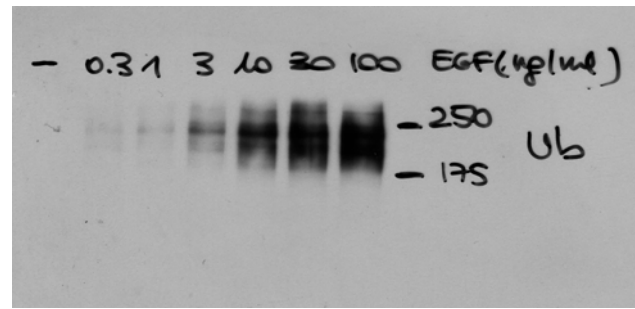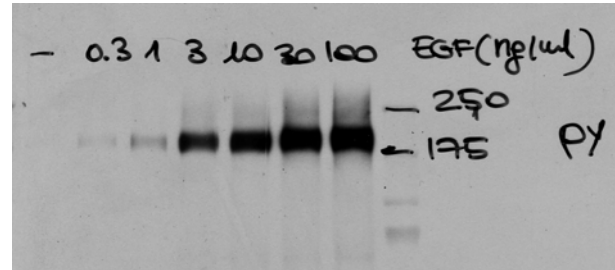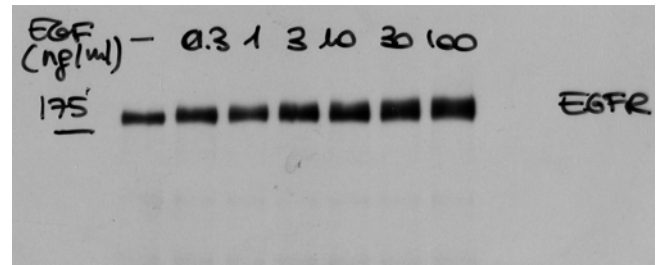**B**

pY1045

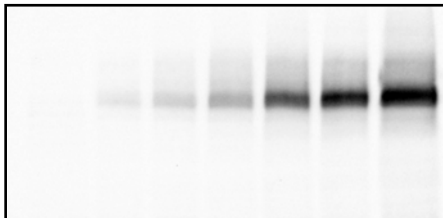

pY 1068

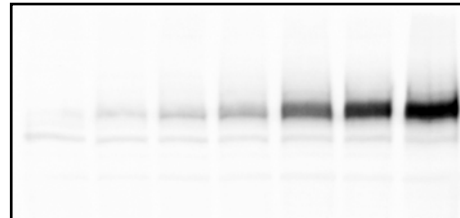

pY1173 (reblotted after stripping pY1045)

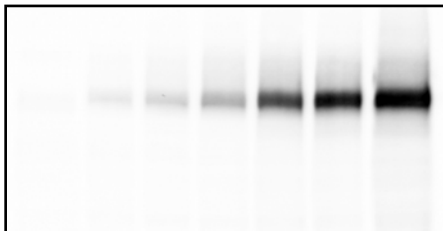

pY1086 (reblotted after stripping pY1068)

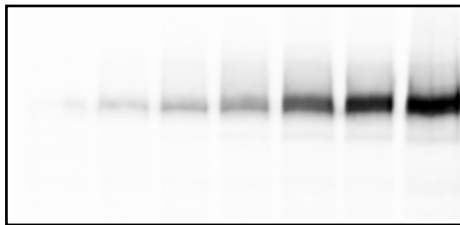

ChemiDoc exposure

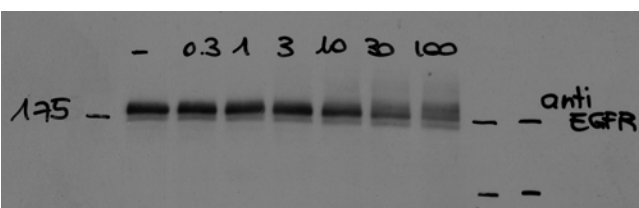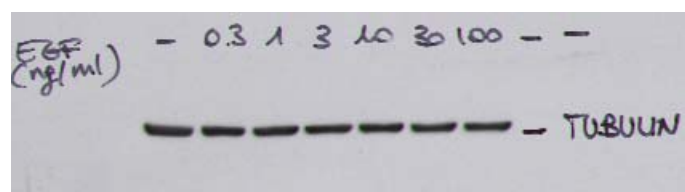

Figure 1
