# Supplementary figures and images for: Threshold-controlled ubiquitination of the EGFR directs receptor fate
Source: PubMed Central journal article supplement — EMBO J. 2013 Jun 25;32(15):2140–57. doi: 10.1038/emboj.2013.149 (PMC3730230; doi:10.1038/emboj.2013.149), 2013-06-25

A

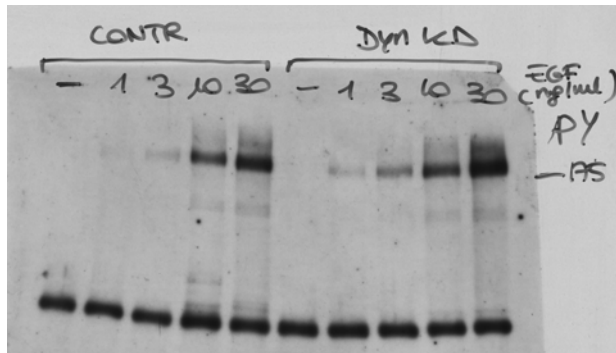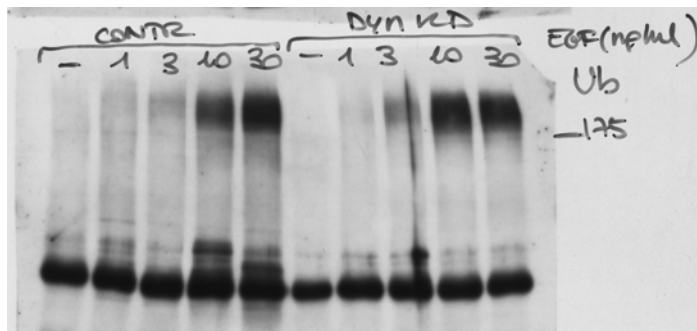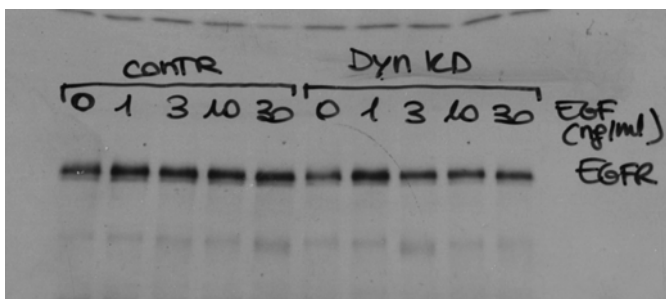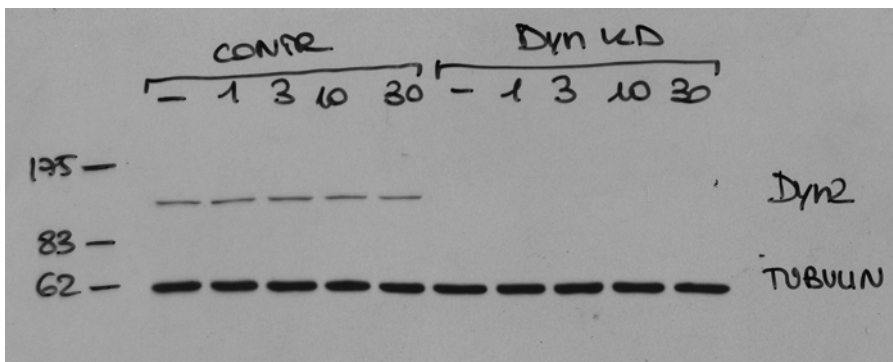

Figure 3

Supplement: emboj2013149df3.pdf [file emboj2013149df3.pdf]

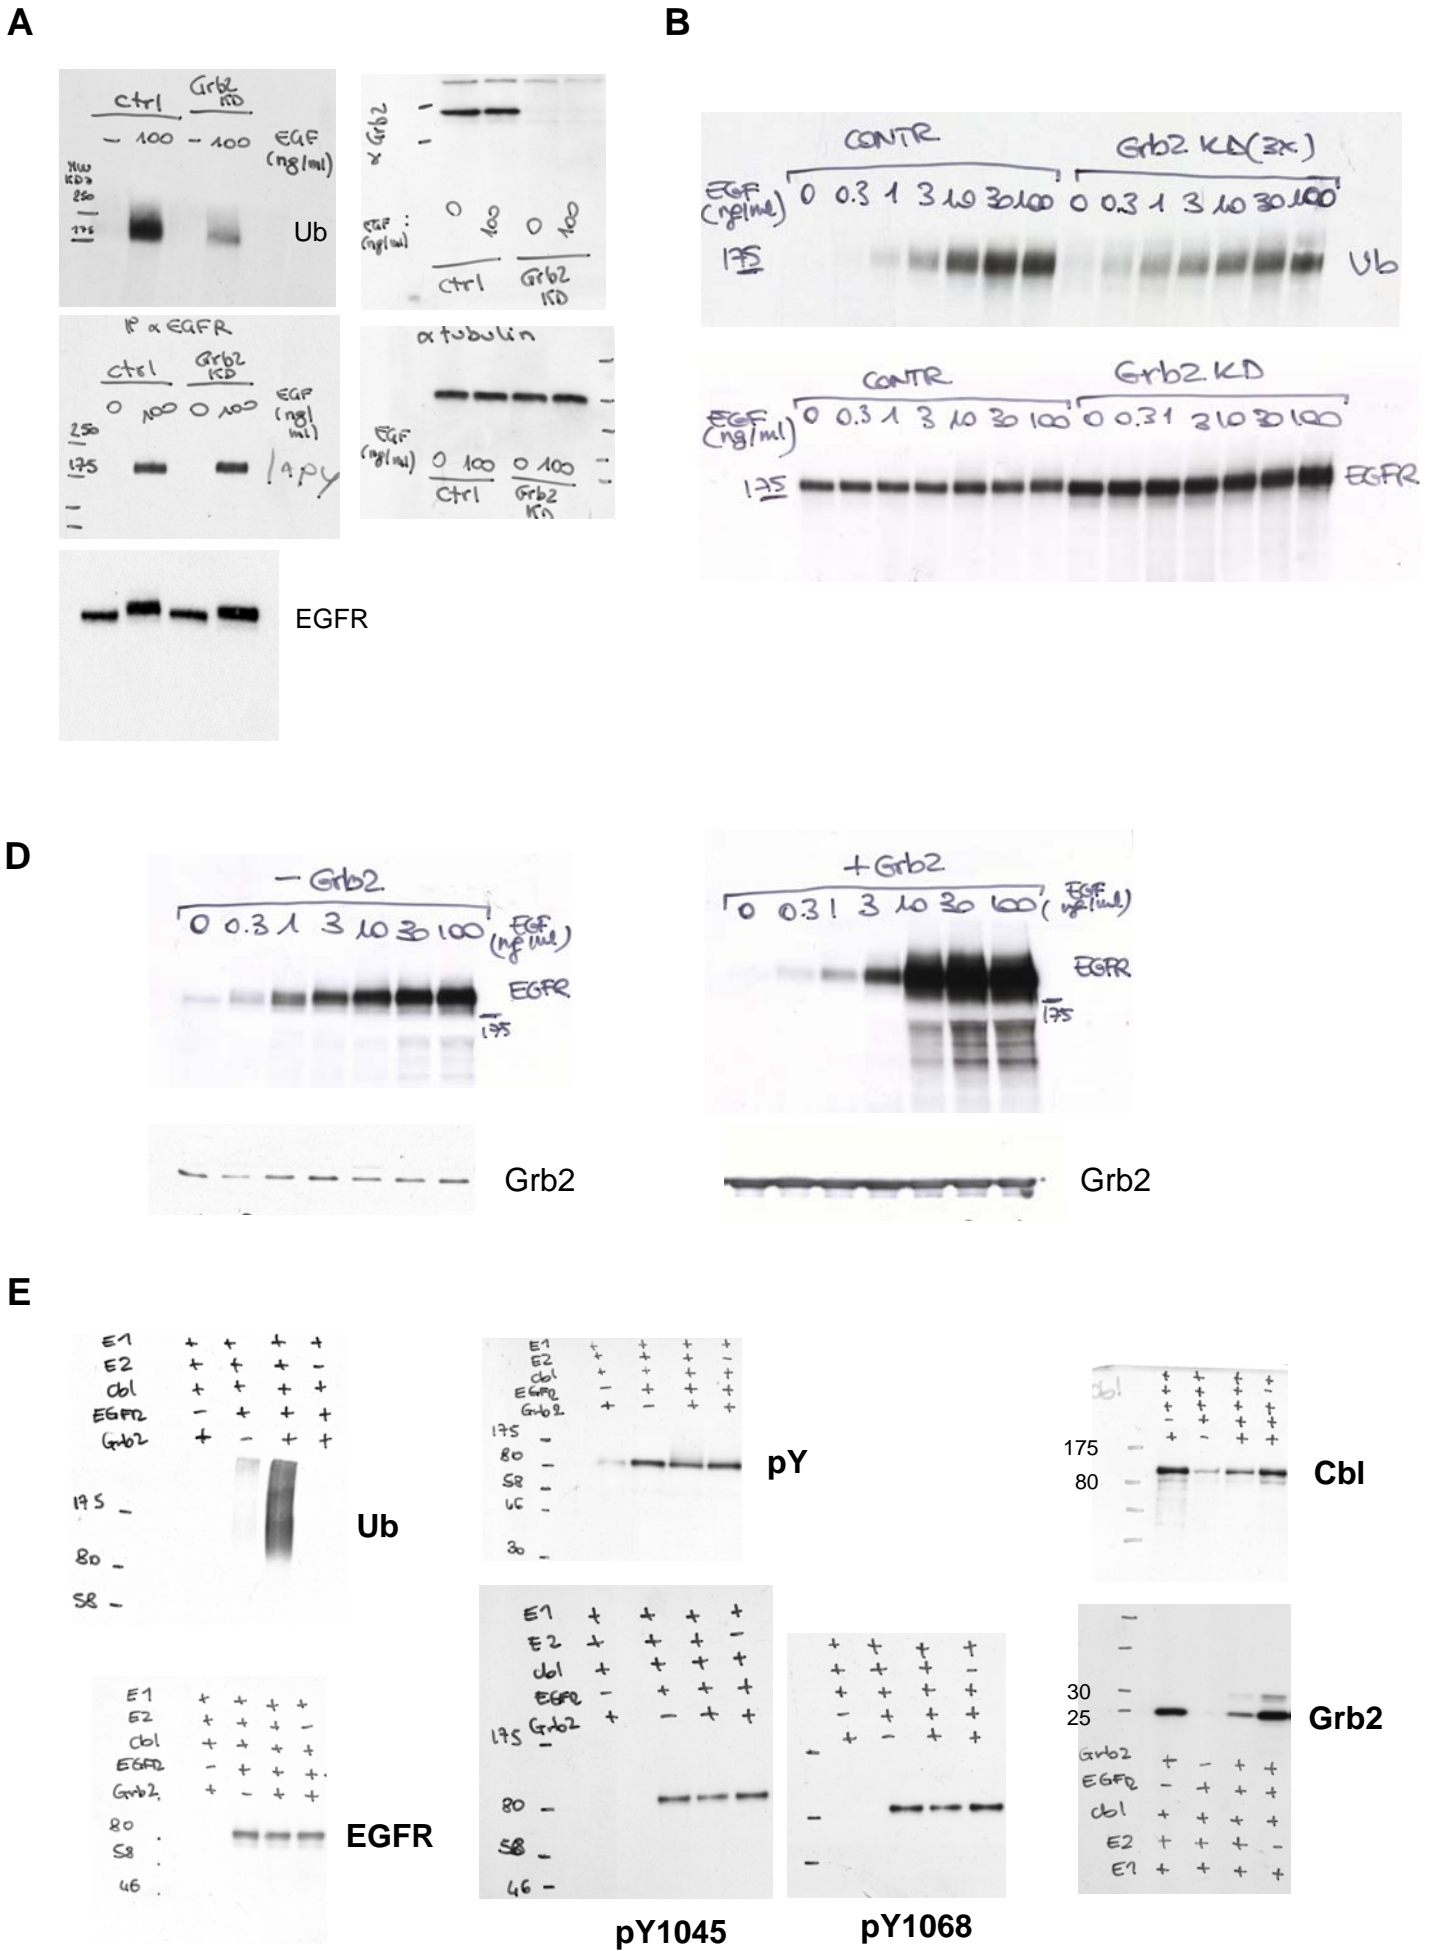

Supplement: emboj2013149df6.pdf [file emboj2013149df6.pdf]
